# Supplementary material for: Adjustable anchoring of Ni/Co cations by oxygen-containing functional groups on functionalized graphite paper and accelerated mass/electron transfer for overall water splitting
Source: Royal Society of Chemistry journal article supplement (doi:10.1039/d0cy00181c), 2020-01-01
Supplement: d0cy00181c1.pdf [file d0cy00181c1.pdf]

## Supporting Information

### **Adjustable Anchoring of Ni/Co Cations by Oxygen-Containing Functional Groups on Functionalized Graphite Paper and Accelerated Mass/Electron Transfer for Overall Water Splitting**

Yiyi Huang,<sup>a</sup> Lei Sun,<sup>b</sup> Zebin Yu,<sup>\*a</sup> Ronghua Jiang,<sup>c</sup> Jun Huang,<sup>d</sup> Yanping Hou,<sup>a</sup> Fei Yang,<sup>e</sup> Boge Zhang,<sup>a</sup> Runzhi Zhang,<sup>a</sup> and Yalan Zhang<sup>a</sup>

- a. School of Resources, Environment and Materials, Guangxi University, Nanning 530004, P. R. China.
- b. School of Chemical Engineering and Technology, Hainan University, Haikou 570228, P. R. China.
- c. School of Chemical and Environmental Engineering, Shaoguan University, Shaoguan 512005, P. R. China.
- d. College of Civil Engineering and Architecture, Guangxi University, Nanning 530004, P. R. China.
- e. Guangzhou Institution Energy Testing, Guangzhou 510170, P. R. China.

Corresponding author: Zebin Yu. Tel./fax.: + 8613877108420

E-mail: xxzx7514@hotmail.com (Z. Yu)

## Figure of the content

**Figure S1.** XPS analysis of O 1s spectra: (a) FGP<sub>0.48</sub>, (b) FGP<sub>0.35</sub>, (c) FGP<sub>0.44</sub>, and (d) FGP<sub>0.41</sub>.

**Figure S2.** Raman spectra of FGP<sub>0.48</sub>, FGP<sub>0.35</sub>, FGP<sub>0.44</sub>, and FGP<sub>0.41</sub> in the wavenumber region from 1000 to 3000 cm<sup>-1</sup>.

**Figure S3.** FE-SEM images of FGP<sub>0.48</sub> (a and b), FGP<sub>0.35</sub> (c and d), FGP<sub>0.44</sub> (e and f), and FGP<sub>0.41</sub> (g and h).

**Figure S4.** CV curve of (a) FGP<sub>0.48</sub>, (b) FGP<sub>0.35</sub>, (c) FGP<sub>0.44</sub>, and (d) FGP<sub>0.41</sub> under different scan rates at a voltage range of 0.884 V-1.004 V (vs. RHE). (e) Plots of current density difference ( $\Delta j$ ) at 0.944 V (vs. RHE) against different scan rates for calculation of  $C_{dl}$ .

**Figure S5.** (a) EIS plots of FGP<sub>0.48</sub>, FGP<sub>0.35</sub>, FGP<sub>0.44</sub>, and FGP<sub>0.41</sub> at 0.924 V (vs. RHE). Inset: the enlarged EIS plots at the high-frequency region. (b) The resistivity comparison of FGP<sub>0.48</sub> and FGP<sub>0.44</sub>.

**Figure S6.** Photoluminescence (PL) spectra for NCS-NCO/FGP<sub>0.44</sub>.

**Figure S7.** CV curve of NCS-NCO/FGP<sub>0.48</sub> (a), NCS-NCO/FGP<sub>0.35</sub> (b), NCS-NCO/FGP<sub>0.44</sub> (c), NCS-NCO/FGP<sub>0.41</sub> (d), and NCO/FGP<sub>0.44</sub> (e) under different scan rates.

**Figure S8.** Raman spectra of NCS-NCO/FGP<sub>0.48</sub>, NCS-NCO/FGP<sub>0.35</sub>, NCS-NCO/FGP<sub>0.44</sub>, and NCS-NCO/FGP<sub>0.41</sub> with their D and G peaks.

**Figure S9.** The comparison of  $C_{dl}$  from recent report carbon-based bifunctional electrocatalysts and NCS-NCO/FGP<sub>0.44</sub>.

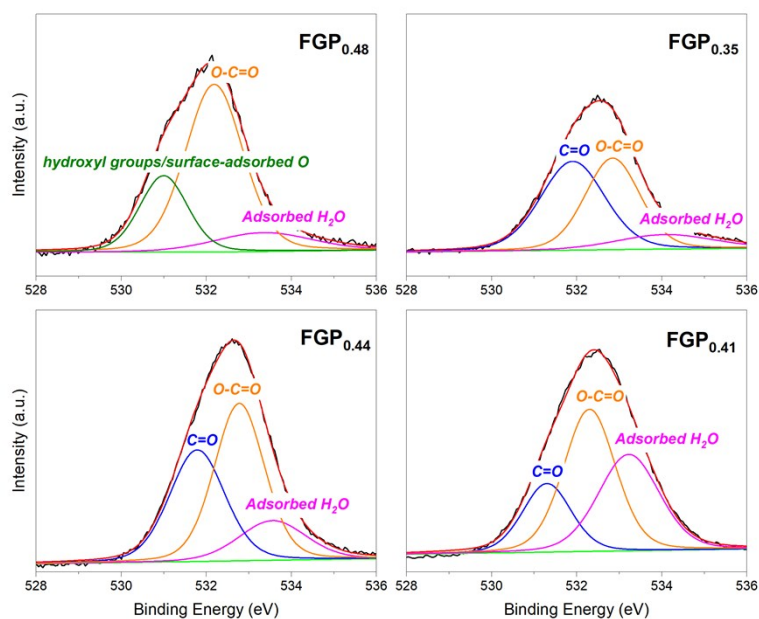

**Figure S1.** XPS analysis of O 1s spectra: (a) FGP<sub>0.48</sub>, (b) FGP<sub>0.35</sub>, (c) FGP<sub>0.44</sub>, and (d) FGP<sub>0.41</sub>.

The surface states of O species under different exfoliated times demonstrated in Fig. S1. Firstly, FGP<sub>0.48</sub> electrode corresponds to three peaks of hydroxyl groups/surface-adsorbed O (531.0 eV), O=C-O groups (532.2 eV), and adsorbed H<sub>2</sub>O (533.4 eV), respectively.<sup>1-3</sup> After electrochemical exfoliating, FGP<sub>0.35</sub>, FGP<sub>0.44</sub>, and FGP<sub>0.41</sub> electrodes correspond to three peaks of C=O (531.3-531.9 eV), O=C-O groups (532.3-532.8 eV), and adsorbed H<sub>2</sub>O (533.2-534.0 eV), respectively.<sup>4</sup> Obviously, this is consistent with the results of the XPS spectra of C 1s, which further confirms that the functionalized graphite paper electrode successfully introduced the oxygen-containing functional group.

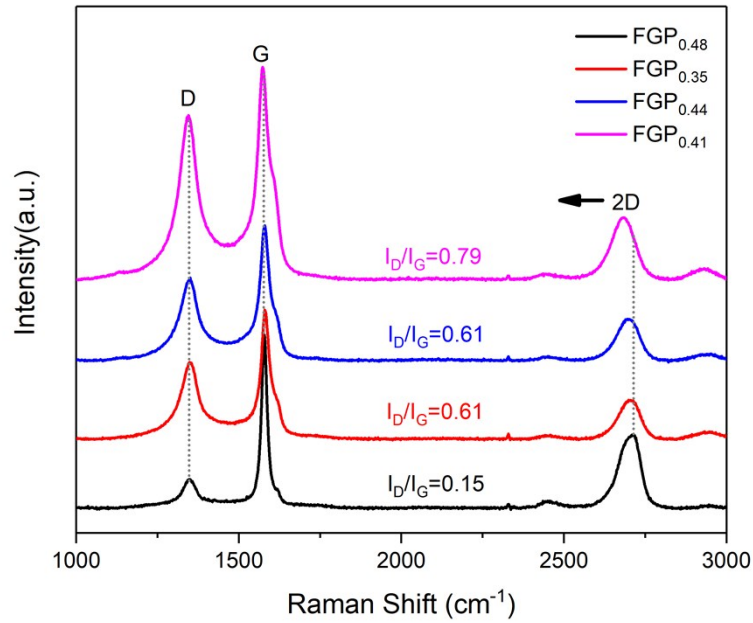

**Figure S2.** Raman spectra of FGP<sub>0.48</sub>, FGP<sub>0.35</sub>, FGP<sub>0.44</sub>, and FGP<sub>0.41</sub> in the wavenumber region from 1000 to 3000 cm<sup>-1</sup>.

To analyze the graphitization degree and defect degree of the graphite catalysts, the vibrational peaks of D-band, G-band, and 2D-band at ~1350, ~1580, and ~2670 cm<sup>-1</sup> were measured. The D-band corresponds to the vibration of sp<sup>3</sup>-hybridized carbon atoms in disordered and defective regions, while G-band belongs to the E<sub>2g</sub> vibration mode of sp<sup>2</sup> carbon atom. Thus, using the I<sub>D</sub>/I<sub>G</sub> ratio can qualitatively evaluate the graphitization sequence and defects of carbonaceous materials. The 2D waveband is a two-phonon resonance mode, and its strength reflects the stacking degree of graphene.<sup>5</sup>

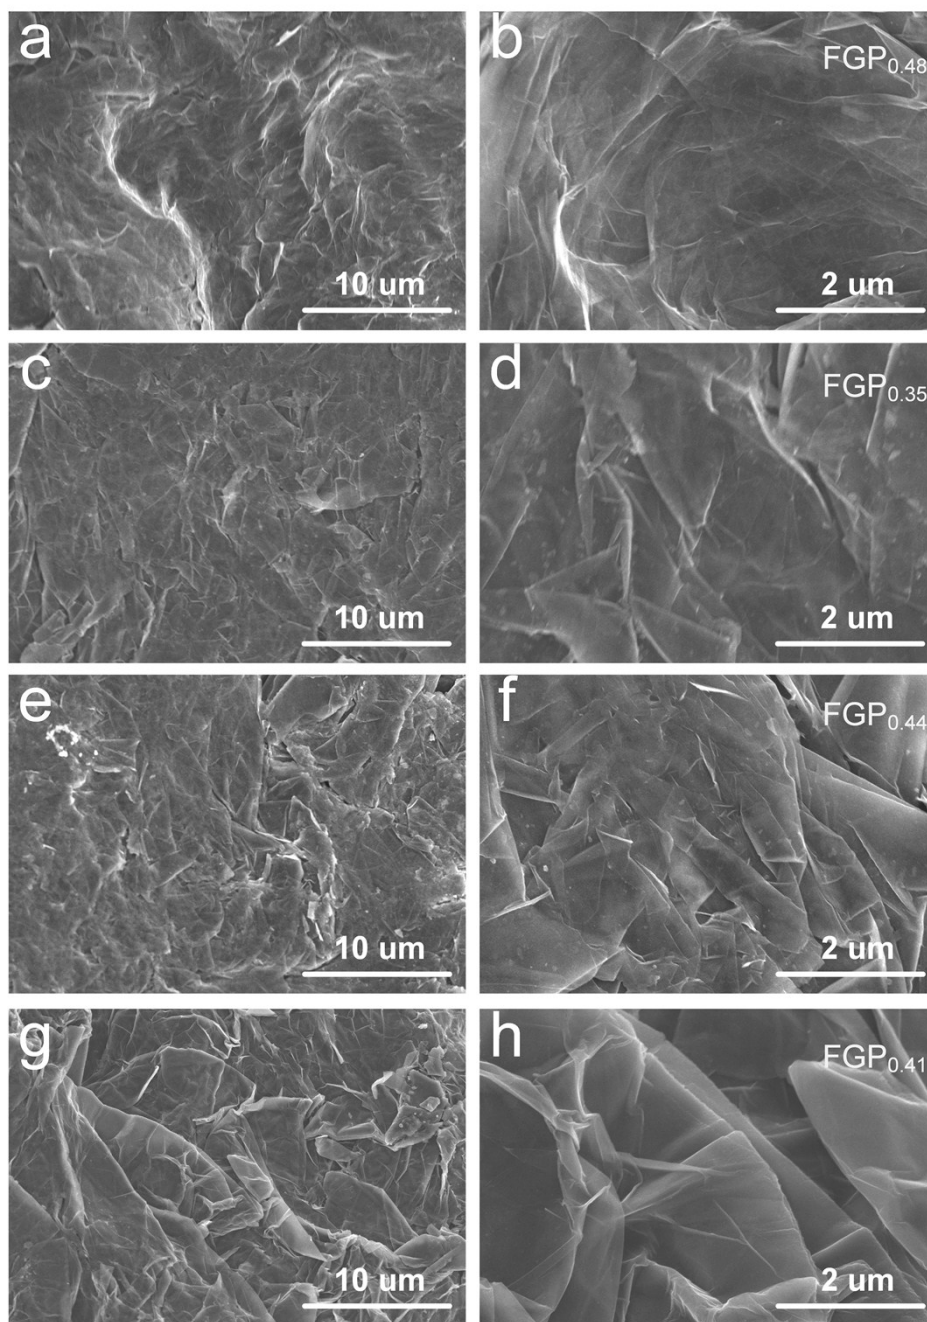

**Figure S3.** FE-SEM images of FGP<sub>0.48</sub> (a and b), FGP<sub>0.35</sub> (c and d), FGP<sub>0.44</sub> (e and f), and FGP<sub>0.41</sub> (g and h).

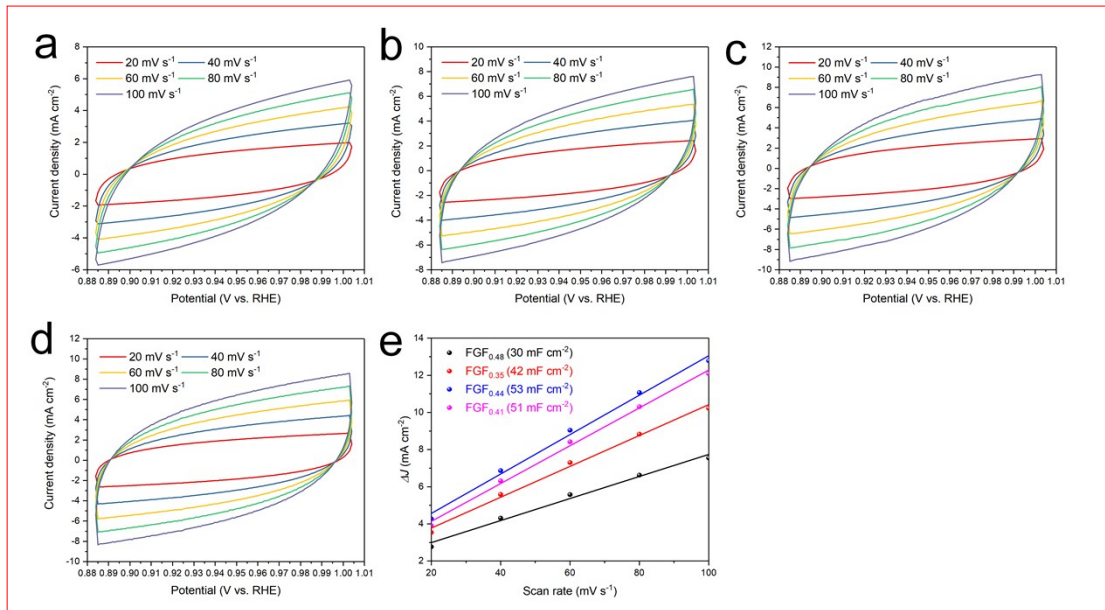

**Figure S4.** CV curve of (a) FGP<sub>0.48</sub>, (b) FGP<sub>0.35</sub>, (c) FGP<sub>0.44</sub>, and (d) FGP<sub>0.41</sub> under different scan rates at a voltage range of 0.884 V-1.004 V (vs. RHE). (e) Plots of current density difference ( $\Delta j$ ) at 0.944 V (vs. RHE) against different scan rates for calculation of  $C_{dl}$ .

The  $C_{dl}$  of the FGP electrodes were calculated from the results of the CV scan, and the ECSA values were calculated (Figure S4a-e). The calculated  $C_{dl}$  of the FGP electrodes are: 30, 42, 53, 51 mF cm<sup>-2</sup>, and their corresponding ECSA are: 750, 1050, 1325, 1275 cm<sup>2</sup>.

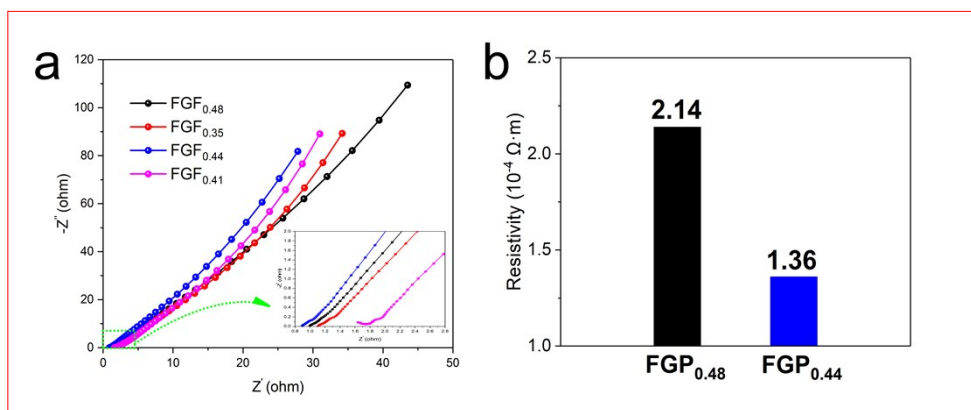

**Figure S5.** (a) EIS plots of FGP<sub>0.48</sub>, FGP<sub>0.35</sub>, FGP<sub>0.44</sub>, and FGP<sub>0.41</sub> at 0.924 V (vs. RHE). Inset: the enlarged EIS plots at the high-frequency region. (b) The resistivity comparison of FGP<sub>0.48</sub> and FGP<sub>0.44</sub>.

The EIS of FGP electrodes were measured to characterize their conductivity and Fig. S5a shows their Nyquist plots. Obviously, FGP<sub>0.44</sub> has the largest slope and the smallest X-axis intercept (the inset of Fig. S5a), showing its optimal electron transport process and conductivity.<sup>6</sup> The total impedance values of FGP<sub>0.48</sub>, FGP<sub>0.35</sub>, FGP<sub>0.44</sub>, and FGP<sub>0.41</sub> after fitting are: 1.189, 1.092, 0.943, and 2.439  $\Omega$ , respectively. The larger impedance value of FGP<sub>0.41</sub> may be due to the large number of functional groups adsorbed on the exfoliated graphene surface during the electrochemical process, which results in a larger contact resistance between the electrolyte and the graphene so that it shows an increased resistance value. Besides, the resistivities of the FGP<sub>0.48</sub> and FGP<sub>0.44</sub> electrodes were detected by a four-point probe measurement (Fig. S5b). The results show that the resistivity of the FGP after exfoliating decreased from  $2.14 \times 10^{-4}$  to  $1.36 \times 10^{-4}$   $\Omega \cdot m$ , showing the increased electrical conductivity of the functionalized graphene.

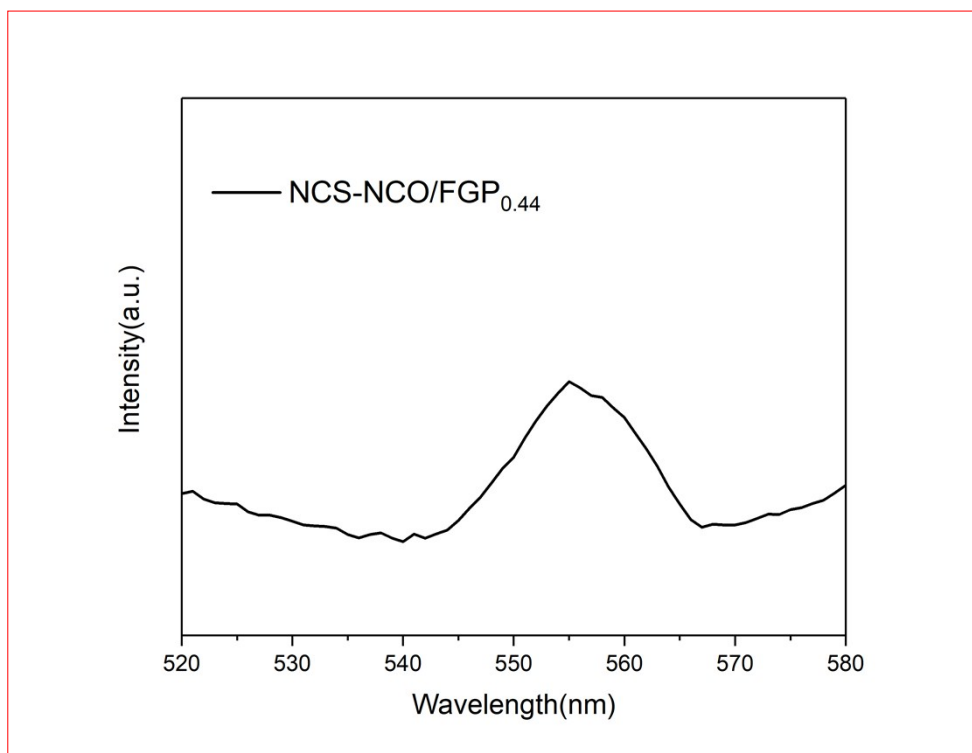

**Figure S6.** Photoluminescence (PL) spectra for NCS-NCO/FGP<sub>0.44</sub>.



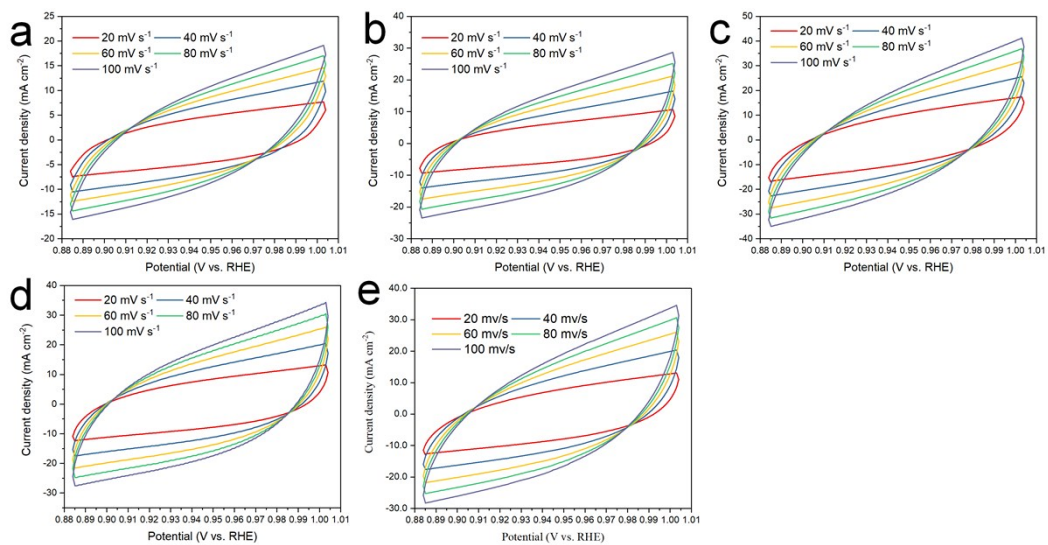

**Figure S7.** CV curve of NCS-NCO/FGP<sub>0.48</sub> (a), NCS-NCO/FGP<sub>0.35</sub> (b), NCS-NCO/FGP<sub>0.44</sub> (c), NCS-NCO/FGP<sub>0.41</sub> (d), and NCO/FGP<sub>0.44</sub> (e) under different scan rates.

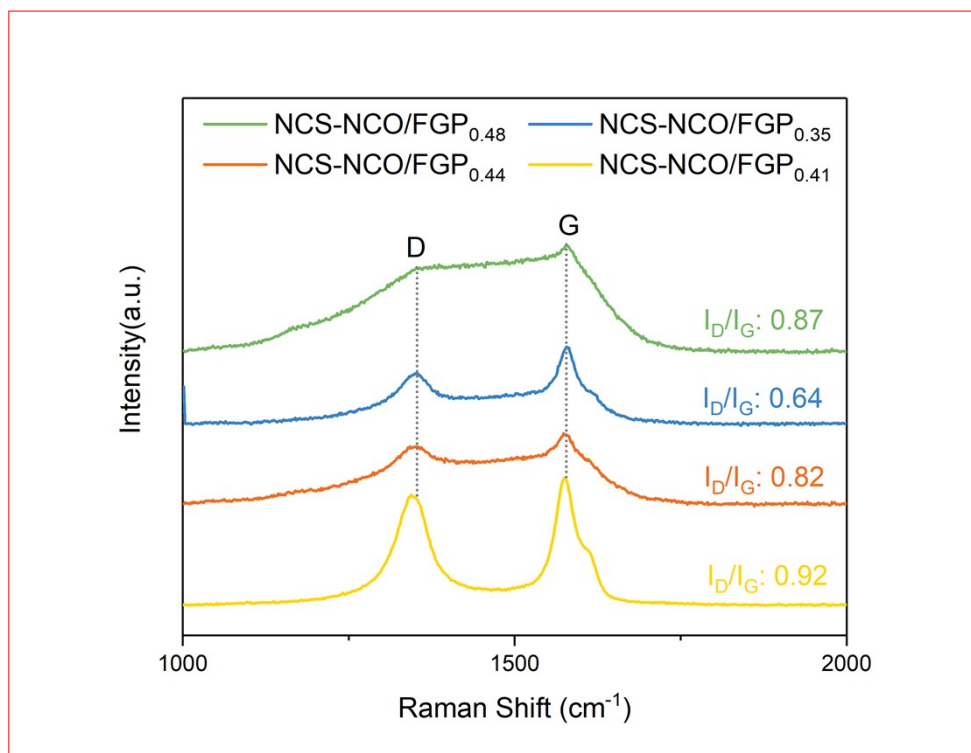

**Figure S8.** Raman spectra of NCS-NCO/FGP<sub>0.48</sub>, NCS-NCO/FGP<sub>0.35</sub>, NCS-NCO/FGP<sub>0.44</sub>, and NCS-NCO/FGP<sub>0.41</sub> with their D and G peaks.

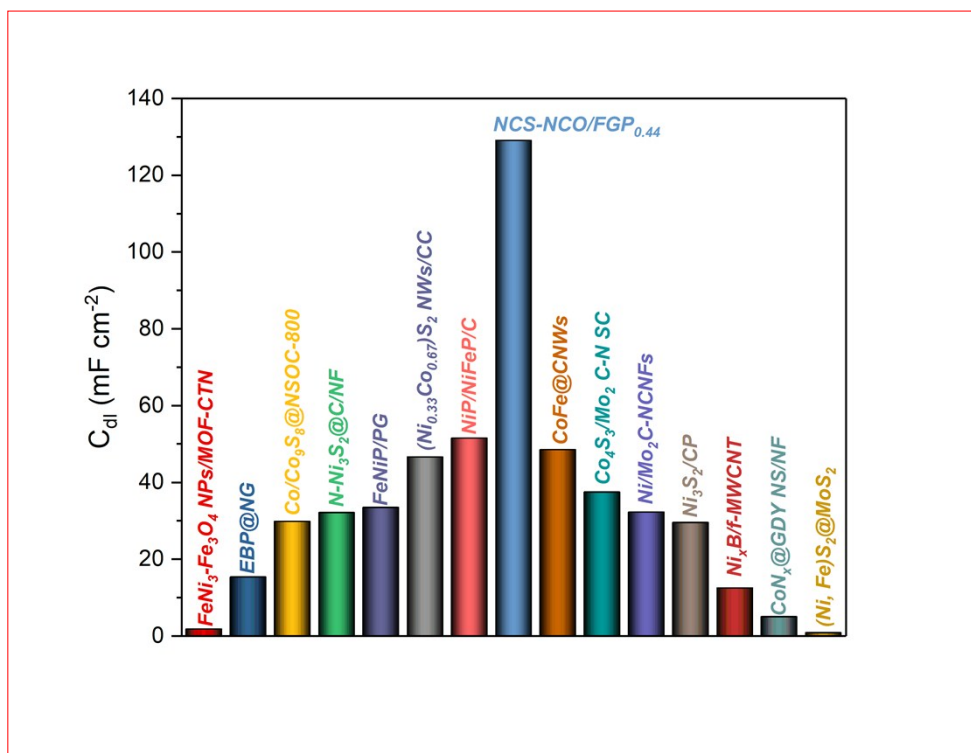

**Figure S9.** The comparison of  $C_{dl}$  from recent report carbon-based bifunctional electrocatalysts and NCS-NCO/FGP<sub>0.44</sub>.

The  $C_{dl}$  of these carbon-based bifunctional electrocatalysts were performed in a 1M KOH solution. Its calculations are all derived from the CV curves without Faradaic progress. <sup>7-20</sup>

## Table of the content

**Table S1.** The percentage areas of oxygen-containing functional groups in FGP<sub>0.48</sub>, FGP<sub>0.35</sub>, FGP<sub>0.44</sub>, and FGP<sub>0.41</sub>, which calculated by fitting the corresponding XPS peaks, respectively.

**Table S2.** The atomic content of anchored Ni and Co cations for NCS-NCO/FGP<sub>0.48</sub>, NCS-NCO/FGP<sub>0.35</sub>, NCS-NCO/FGP<sub>0.44</sub>, NCS-NCO/FGP<sub>0.41</sub>, which was calculated by ICP-OES.

**Table S3.** EIS data fitting results of NCS-NCO/FGP<sub>0.48</sub>, NCS-NCO/FGP<sub>0.35</sub>, NCS-NCO/FGP<sub>0.44</sub>, NCS-NCO/FGP<sub>0.41</sub>, and NCO/FGP<sub>0.44</sub> electrodes for OER, respectively.

**Table S4.** Comparison of the electrochemical performances of NCS-NCO/FGP<sub>0.44</sub> electrode for OER with recently reported catalysts in 1.0 M KOH.

**Table S5.** EIS data fitting results of NCS-NCO/FGP<sub>0.48</sub>, NCS-NCO/FGP<sub>0.35</sub>, NCS-NCO/FGP<sub>0.44</sub>, NCS-NCO/FGP<sub>0.41</sub>, and NCO/FGP<sub>0.44</sub> electrodes for HER.

**Table S6.** Comparison of the electrochemical performances of NCS-NCO/FGP<sub>0.44</sub> electrode for HER with recently reported catalysts in 1.0 M KOH.

**Table S7.** Catalyst loadings of NCS-NCO/FGP<sub>0.48</sub>, NCS-NCO/FGP<sub>0.35</sub>, NCS-NCO/FGP<sub>0.44</sub>, NCS-NCO/FGP<sub>0.41</sub>, and NCO/FGP<sub>0.44</sub> electrodes.

**Table S8.** Comparison of the electrochemical performances of NCS-NCO/FGP<sub>0.44</sub> electrode for overall water splitting with recently reported catalysts in 1.0 M KOH.

**Table S9.** Parameter settings of NCS-NCO/FGP<sub>0.44</sub> electrode during microwave hydrothermal synthesis.

**Table S1.** The percentage areas of oxygen-containing functional groups in FGP<sub>0.48</sub>, FGP<sub>0.35</sub>, FGP<sub>0.44</sub>, and FGP<sub>0.41</sub>, which calculated by fitting the corresponding XPS peaks, respectively.

| Electrode<br>s      | C-C       | oxygen-containing functional groups |          |          |          | Area 1 <sup>a</sup> | Area 2 <sup>b</sup> | Percentage <sup>c</sup> |
|---------------------|-----------|-------------------------------------|----------|----------|----------|---------------------|---------------------|-------------------------|
|                     |           | C-OH                                | C-O      | C=O      | O-C=O    |                     |                     |                         |
| FGP <sub>0.48</sub> | 61502.34  | 32044.11                            | 14845.46 | -        | 10156.81 | 118548.72           | 57046.38            | 0.48                    |
| FGP <sub>0.35</sub> | 78944.59  | 9268.97                             | 16531.68 | 4790.32  | 11381.39 | 120916.94           | 41972.35            | 0.35                    |
| FGP <sub>0.44</sub> | 65612.39  | 11239.78                            | 22391.02 | 9781.33  | 8191.45  | 117215.97           | 51603.58            | 0.44                    |
| FGP <sub>0.41</sub> | 127433.30 | 27318.62                            | 25924.30 | 20520.75 | 14584.25 | 215781.22           | 88347.92            | 0.41                    |

---

<sup>a</sup> The areas of all peaks in C 1s.

<sup>b</sup> The areas of the peaks of oxygen-containing functional groups.

<sup>c</sup> The percentage areas of oxygen-containing functional groups.

**Table S2.** The atomic content of anchored Ni and Co cations for NCS-NCO/FGP<sub>0.48</sub>, NCS-NCO/FGP<sub>0.35</sub>, NCS-NCO/FGP<sub>0.44</sub>, and NCS-NCO/FGP<sub>0.41</sub>, which were counted by ICP-OES.

| Electrodes                  | The atomic content of metal cations anchored ( $\mu\text{mol cm}^{-2}$ ) |       |                  |
|-----------------------------|--------------------------------------------------------------------------|-------|------------------|
|                             | Ni                                                                       | Co    | Sum <sup>a</sup> |
| NCS-NCO/FGP <sub>0.48</sub> | 4.29                                                                     | 10.53 | 14.82            |
| NCS-NCO/FGP <sub>0.35</sub> | 4.17                                                                     | 15.49 | 19.66            |
| NCS-NCO/FGP <sub>0.44</sub> | 4.36                                                                     | 13.37 | 17.73            |
| NCS-NCO/FGP <sub>0.41</sub> | 5.06                                                                     | 14.51 | 19.57            |

---

<sup>a</sup> The sum atomic content of anchored metal cations.

**Table S3.** EIS data fitting results of NCS-NCO/FGP<sub>0.48</sub>, NCS-NCO/FGP<sub>0.35</sub>, NCS-NCO/FGP<sub>0.44</sub>, NCS-NCO/FGP<sub>0.41</sub>, and NCO/FGP<sub>0.44</sub> electrodes for OER, respectively.

| Electrode                         | R <sub>s</sub> (Ω) | R <sub>dl</sub> (Ω) | R <sub>ct</sub> (Ω) | R <sub>tot</sub> (Ω) |
|-----------------------------------|--------------------|---------------------|---------------------|----------------------|
| NCS-NCO/FGP <sub>0.48</sub>       | 1.129              | 1.326               | 4.253               | 6.708                |
| NCS-NCO/FGP <sub>0.35</sub>       | 1.307              | 1.238               | 4.068               | 6.613                |
| <b>NCS-NCO/FGP<sub>0.44</sub></b> | <b>1.095</b>       | <b>1.277</b>        | <b>3.215</b>        | <b>5.587</b>         |
| NCS-NCO/FGP <sub>0.41</sub>       | 1.389              | 1.658               | 4.057               | 7.104                |
| NCO/FGP <sub>0.44</sub>           | 1.389              | 0.641               | 4.909               | 6.939                |

**Table S4.** Comparison of the electrochemical performances of NCS-NCO/FGP<sub>0.44</sub> electrode for OER with recently reported catalysts in 1.0 M KOH.

| Electrode                                                  | Substrate                     | j<br>(mA cm <sup>-2</sup> ) | η<br>(mV vs RHE) | Ref.      |
|------------------------------------------------------------|-------------------------------|-----------------------------|------------------|-----------|
| NCS-NCO/FGP <sub>0.48</sub>                                | FGP <sub>0.48</sub>           | 10                          | 246              | This work |
| NCS-NCO/FGP <sub>0.35</sub>                                | FGP <sub>0.35</sub>           | 10                          | 291              |           |
| <b>NCS-NCO/FGP<sub>0.44</sub></b>                          | <b>FGP<sub>0.44</sub></b>     | <b>10</b>                   | <b>117</b>       |           |
| NCS-NCO/FGP <sub>0.41</sub>                                | FGP <sub>0.41</sub>           | 10                          | 199              |           |
| NCO/FGP <sub>0.44</sub>                                    | FGP <sub>0.44</sub>           | 10                          | 304              |           |
| RuO <sub>2</sub> /FGP <sub>0.44</sub>                      | FGP <sub>0.44</sub>           | 10                          | 320              |           |
| CoS <sub>2</sub> -C@MoS <sub>2</sub>                       | -                             | 10                          | 391              | 21        |
| Ni <sub>3</sub> S <sub>2</sub>                             | -                             | 10                          | 295              | 17        |
| Ni <sub>3</sub> S <sub>2</sub>                             | NF                            | 10                          | 296              | 22        |
| CoMoS <sub>4</sub> /Ni <sub>3</sub> S <sub>2</sub>         | NF                            | 10                          | 200              | 23        |
| CoS <sub>x</sub> Se <sub>2(1-x)</sub>                      | CC                            | 10                          | 285              | 24        |
| CoN <sub>x</sub> @GDY                                      | GDY <sup>a</sup> -modified NF | 10                          | 260              | 19        |
| MoS <sub>2</sub> /NiCoS heterostructure                    | -                             | 10                          | 290              | 25        |
| (Ni, Fe) S <sub>2</sub> @MoS <sub>2</sub> heterostructures | CFP <sup>b</sup>              | 10                          | 270              | 20        |
| Pt-αFe <sub>2</sub> O <sub>3</sub>                         | NF                            | 50                          | 304              | 26        |
| Ru/Cu <sub>2+1</sub> O                                     | CuF <sup>c</sup>              | 10                          | 210              | 27        |

<sup>a</sup> Graphdiyne.

<sup>b</sup> Carbon fiber paper.

<sup>c</sup> Cu foam



**Table S5.** EIS data fitting results of NCS-NCO/FGP<sub>0.48</sub>, NCS-NCO/FGP<sub>0.35</sub>, NCS-NCO/FGP<sub>0.44</sub>, NCS-NCO/FGP<sub>0.41</sub>, and NCO/FGP<sub>0.44</sub> electrodes for HER.

| Electrode                         | R <sub>s</sub> (Ω) | R <sub>dl1</sub> (Ω) | R <sub>dl2</sub> (Ω) | R <sub>ct</sub> (Ω) | R <sub>tot</sub> (Ω) |
|-----------------------------------|--------------------|----------------------|----------------------|---------------------|----------------------|
| NCS-NCO/FGP <sub>0.48</sub>       | 1.027              | 0.556                | 1.390                | 5.100               | 8.073                |
| NCS-NCO/FGP <sub>0.35</sub>       | 1.413              | 0.324                | 1.046                | 4.400               | 7.183                |
| <b>NCS-NCO/FGP<sub>0.44</sub></b> | <b>1.075</b>       | <b>0.204</b>         | <b>0.757</b>         | <b>3.335</b>        | <b>5.371</b>         |
| NCS-NCO/FGP <sub>0.41</sub>       | 0.883              | 0.374                | 1.293                | 4.330               | 6.880                |
| NCO/FGP <sub>0.44</sub>           | 1.469              | 0.341                | 1.289                | 4.882               | 7.981                |

**Table S6.** Comparison of the electrochemical performances of NCS-NCO/FGP<sub>0.44</sub> electrode for HER with recently reported catalysts in 1.0 M KOH.

| Catalyst                                                   | Substrate                 | j<br>(mA cm <sup>-2</sup> ) | η<br>(mV vs. RHE) | Ref.      |
|------------------------------------------------------------|---------------------------|-----------------------------|-------------------|-----------|
| NCS-NCO/FGP <sub>0.48</sub>                                | FGP <sub>0.48</sub>       | 10                          | -219              | This work |
| NCS-NCO/FGP <sub>0.35</sub>                                | FGP <sub>0.35</sub>       | 10                          | -172              |           |
| <b>NCS-NCO/FGP<sub>0.44</sub></b>                          | <b>FGP<sub>0.44</sub></b> | <b>10</b>                   | <b>-145</b>       |           |
| NCS-NCO/FGP <sub>0.41</sub>                                | FGP <sub>0.41</sub>       | 10                          | -199              |           |
| NCO/FGP <sub>0.44</sub>                                    | FGP <sub>0.44</sub>       | 10                          | -235              |           |
| Pt/C/FGP <sub>0.44</sub>                                   | FGP <sub>0.44</sub>       | 10                          | -30               |           |
| CoS <sub>2</sub> -C@MoS <sub>2</sub>                       | -                         | 10                          | -173              | 21        |
| Ni <sub>3</sub> S <sub>2</sub>                             | -                         | 10                          | -112              | 17        |
| Ni <sub>3</sub> S <sub>2</sub>                             | NF                        | 10                          | -189              | 22        |
| CoMoS <sub>4</sub> /Ni <sub>3</sub> S <sub>2</sub>         | NF                        | 10                          | -76               | 23        |
| CoS <sub>x</sub> Se <sub>2(1-x)</sub>                      | CC                        | 10                          | -225              | 24        |
| CoN <sub>x</sub> @GDY                                      | GDY-modified NF           | 10                          | -70               | 19        |
| MoS <sub>2</sub> /NiCoS heterostructure                    | -                         | 10                          | 189               | 25        |
| (Ni, Fe) S <sub>2</sub> @MoS <sub>2</sub> heterostructures | CFP                       | 10                          | -130              | 20        |
| Pt-αFe <sub>2</sub> O <sub>3</sub>                         | NF                        | 10                          | -90               | 26        |
| Ru/Cu <sub>2+1</sub> O                                     | CuF                       | 10                          | -32               | 27        |

**Table S7.** Catalyst loading of NCS-NCO/FGP<sub>0.48</sub>, NCS-NCO/FGP<sub>0.35</sub>, NCS-NCO/FGP<sub>0.44</sub>, NCS-NCO/FGP<sub>0.41</sub>, and NCO/FGP<sub>0.44</sub> electrodes.

| Electrode                   | Mass of catalyst (mg cm <sup>2</sup> ) |                             | Catalyst loading (mg cm <sup>2</sup> ) |
|-----------------------------|----------------------------------------|-----------------------------|----------------------------------------|
|                             | m <sub>0</sub> <sup>a</sup>            | m <sub>1</sub> <sup>b</sup> | $\Delta m^c$                           |
| NCS-NCO/FGP <sub>0.48</sub> | 148.6                                  | 134.1                       | 14.5                                   |
| NCS-NCO/FGP <sub>0.35</sub> | 128.5                                  | 113.1                       | 15.4                                   |
| NCS-NCO/FGP <sub>0.44</sub> | 139.3                                  | 122.6                       | 16.7                                   |
| NCS-NCO/FGP <sub>0.41</sub> | 136.5                                  | 119.9                       | 16.6                                   |
| NCO/FGP <sub>0.44</sub>     | 129.3                                  | 119.1                       | 10.2                                   |

---

<sup>a</sup> The mass of the catalysts before acid treatment

<sup>b</sup> The mass of the catalysts after acid treatment

<sup>c</sup> Catalyst loading:  $\Delta m = m_0 - m_1$

**Table S8.** Comparison of the electrochemical performances of NCS-NCO/FGP<sub>0.44</sub> electrode for overall water splitting with recently reported catalysts in 1.0 M KOH.

| Catalyst                                                       | Substrate                 | j<br>(mA cm <sup>-2</sup> ) | η<br>(mV vs RHE) | Ref.      |
|----------------------------------------------------------------|---------------------------|-----------------------------|------------------|-----------|
| NCS-NCO/FGP <sub>0.48</sub>                                    | FGP <sub>0.48</sub>       | 10                          | 1.580            |           |
| NCS-NCO/FGP <sub>0.35</sub>                                    | FGP <sub>0.35</sub>       | 10                          | 1.544            | This work |
| <b>NCS-NCO/FGP<sub>0.44</sub></b>                              | <b>FGP<sub>0.44</sub></b> | <b>10</b>                   | <b>1.481</b>     |           |
| NCS-NCO/FGP <sub>0.41</sub>                                    | FGP <sub>0.41</sub>       | 10                          | 1.596            |           |
| NCO/FGP <sub>0.44</sub>                                        | FGP <sub>0.44</sub>       | 10                          | 1.636            |           |
| RuO <sub>2</sub> /FGP <sub>0.44</sub> Pt/C/FGP <sub>0.44</sub> | FGP <sub>0.44</sub>       | 10                          | 1.583            |           |
| Ni <sub>3</sub> S <sub>2</sub>                                 | -                         | 10                          | 1.63             | 17        |
| Ni <sub>3</sub> S <sub>2</sub>                                 | NF                        | 10                          | ~1.55            | 22        |
| CoMoS <sub>4</sub> /Ni <sub>3</sub> S <sub>2</sub>             | NF                        | 10                          | 1.568            | 23        |
| CoS <sub>x</sub> Se <sub>2(1-x)</sub>                          | CC                        | 10                          | 1.74             | 24        |
| CoN <sub>x</sub> @GDY                                          | GDY-modified NF           | 10                          | 1.48             | 19        |
| MoS <sub>2</sub> /NiCoS heterostructure                        | NF                        | 10                          | 1.50             | 25        |
| (Ni, Fe) S <sub>2</sub> @MoS <sub>2</sub> heterostructures     | CFP                       | 10                          | 1.56             | 20        |
| Pt-αFe <sub>2</sub> O <sub>3</sub>                             | NF                        | 10                          | 1.51             | 26        |
| Ru/Cu <sub>2+1</sub> O                                         | CuF                       | 10                          | 1.53             | 27        |

**Table S9.** Parameter settings of NCS-NCO/FGP<sub>0.44</sub> electrode during microwave hydrothermal synthesis.

| <b>Experimental stage</b> | <b>Temperature (°C)</b> | <b>Operating time (min)</b> | <b>Power (W)</b> |
|---------------------------|-------------------------|-----------------------------|------------------|
| 1                         | 30                      | 0                           | 600              |
| 2                         | 120                     | 10                          | 600              |
| 3                         | 120                     | 5                           | 600              |
| 4                         | 160                     | 10                          | 600              |
| 5                         | 160                     | 5                           | 600              |
| 6                         | 200                     | 12                          | 600              |
| 7                         | 200                     | 45                          | 600              |

## References

- 1 Y. Zhu, L. Zhang, B. Zhao, H. Chen, X. Liu, R. Zhao, X. Wang, J. Liu, Y. Chen and M. Liu, *Adv. Funct. Mater.*, 2019, **29**, 1901783.
- 2 B. Liu, J. Cheng, H.-Q. Peng, D. Chen, X. Cui, D. Shen, K. Zhang, T. Jiao, M. Li, C.-S. Lee and W. Zhang, *J. Mater. Chem. A*, 2019, **7**, 775-782.
- 3 Z. Li, Y. Zhang, Y. Feng, C.-Q. Cheng, K.-W. Qiu, C.-K. Dong, H. Liu and X.-W. Du, *Adv. Funct. Mater.*, 2019, **29**, 1903444.
- 4 M. Seredych, D. Hulicova-Jurcakova, G. Q. Lu and T. J. Bandosz, *Carbon*, 2008, **46**, 1475-1488.
- 5 W. Yang, J. Tian, L. Hou, B. Deng, S. Wang, R. Li, F. Yang and Y. Li, *ChemSusChem*, 2019, **12**, 4662-4670.
- 6 Q. Dong, Y. Zhang, Z. Dai, P. Wang, M. Zhao, J. Shao, W. Huang and X. Dong, *Nano Res.*, 2018, **11**, 1389-1398.
- 7 K. Srinivas, Y. Lu, Y. Chen, W. Zhang and D. Yang, *ACS Sustainable Chem. Eng.*, 2020, **8**, 3820-3831.
- 8 Z. Yuan, J. Li, M. Yang, Z. Fang, J. Jian, D. Yu, X. Chen and L. Dai, *J. Am. Chem. Soc.*, 2019, **141**, 4972-4979.
- 9 J. Du, R. Wang, Y.-R. Lv, Y.-L. Wei and S.-Q. Zang, *Chemical Communications*, 2019, **55**, 3203-3206.
- 10 Q. Hao, S. Li, H. Liu, J. Mao, Y. Li, C. Liu, J. Zhang and C. Tang, *Catal. Sci. Technol.*, 2019, **9**, 3099-3108.
- 11 F. Bu, W. Chen, M. F. Aly Aboud, I. Shakir, J. Gu and Y. Xu, *J. Mater. Chem. A*, 2019, **7**, 14526-14535.
- 12 Q. Zhang, C. Ye, X. L. Li, Y. H. Deng, B. X. Tao, W. Xiao, L. J. Li, N. B. Li and H. Q. Luo, *ACS Appl. Mater. Interfaces*, 2018, **10**, 27723-27733.
- 13 B. Weng, X. Wang, C. R. Grice, F. Xu and Y. Yan, *J. Mater. Chem. A*, 2019, **7**, 7168-7178.
- 14 X. Wang, B. Zheng, D. Yang, B. Sun, W. Zhang and Y. Chen, *Energy Technol.*, 2019, **0**.
- 15 Y. Liu, X. Luo, C. Zhou, S. Du, D. Zhen, B. Chen, J. Li, Q. Wu, Y. Iru and D. Chen, *Appl. Catal. B Environ.*, 2020, **260**, 118197.
- 16 M. Li, Y. Zhu, H. Wang, C. Wang, N. Pinna and X. Lu, *Adv. Energy Mater.*, 2019, **9**, 1803185.
- 17 X. Zheng, X. Han, Y. Zhang, J. Wang, C. Zhong, Y. Deng and W. Hu, *Nanoscale*, 2019, **11**, 5646-5654.
- 18 X. Chen, Z. Yu, L. Wei, Z. Zhou, S. Zhai, J. Chen, Y. Wang, Q. Huang, H. E. Karahan, X. Liao and Y. Chen, *J. Mater. Chem. A*, 2019, **7**, 764-774.
- 19 Y. Fang, Y. Xue, L. Hui, H. Yu, Y. Liu, C. Xing, F. Lu, F. He, H. Liu and Y. Li, *Nano Energy*, 2019, **59**, 591-597.
- 20 Y. Liu, S. Jiang, S. Li, L. Zhou, Z. Li, J. Li and M. Shao, *Appl. Catal. B Environ.*, 2019, **247**, 107-114.
- 21 Y. Zhu, L. Song, N. Song, M. Li, C. Wang and X. Lu, *ACS Sustainable Chem. Eng.*, 2019, **7**, 2899-2905.
- 22 L. Li, C. Sun, B. Shang, Q. Li, J. Lei, N. Li and F. Pan, *J. Mater. Chem. A*, 2019, **7**, 18003-18011.
- 23 P. Hu, Z. Jia, H. Che, W. Zhou, N. Liu, F. Li and J. Wang, *J. Power Sources*, 2019, **416**, 95-103.
- 24 Y. Zhang, Y. Qiu, X. Ji, T. Ma, Z. Ma and P. A. Hu, *ChemSusChem*, 2019, **12**, 3792-3800.
- 25 C. Qin, A. Fan, X. Zhang, S. Wang, X. Yuan and X. Dai, *J. Mater. Chem. A*, 2019, **7**, 27594-27602.
- 26 B. Ye, L. Huang, Y. Hou, R. Jiang, L. Sun, Z. Yu, B. Zhang, Y. Huang and Y. Zhang, *J. Mater. Chem. A*, 2019, **7**, 11379-11386.
- 27 J. Gao, L. Yang, D. Wang and D. Cao, *Chem. Eur. J.*, 2019, **n/a**.
